# Supplementary material for: Functional Analysis of Water Stress-Responsive Soybean GmNAC003 and GmNAC004 Transcription Factors in Lateral Root Development in Arabidopsis
Source: PubMed Central journal article supplement (PMC3900428; doi:10.1371/journal.pone.0084886), 2014-01-23
Supplement: pone.0084886.s001.pdf [file pone.0084886.s001.pdf]

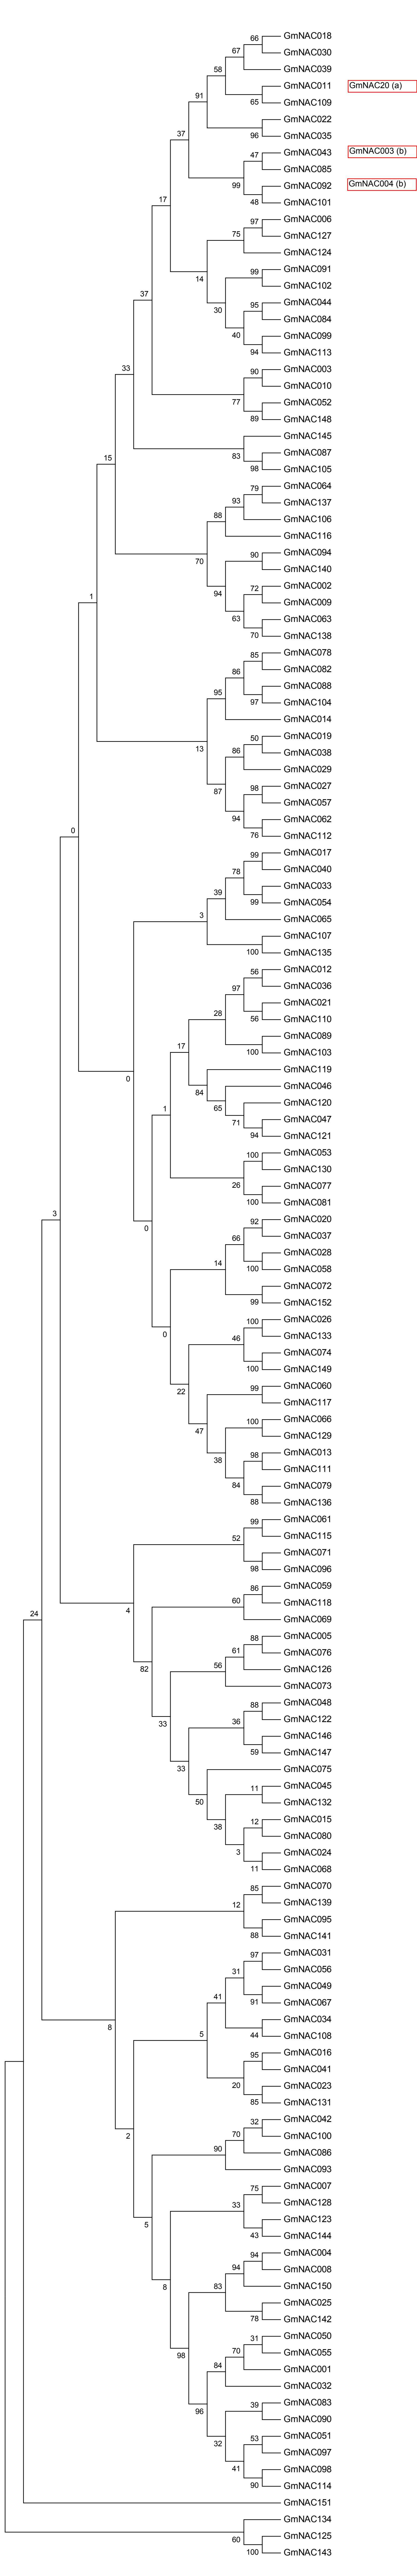

Figure S1. Phylogenetic tree of soybean NAC proteins according to Le *et al.* (2011). Tree was drawn using Mega 5.1 software (Tamura *et al.* 2011) with a bootstrap of 500 replicates. GmNAC20 (Hao *et al.* 2011) and GmNAC003 and GmNAC004 (this paper) were noted on right side, adjacent to the names assigned by Le *et al.* (2011).

**Reference**

Hao YJ, Wei W, Song QX, Chen HW, Zhang YQ, et al. (2011) Soybean NAC transcription factors promote abiotic stress tolerance and lateral root formation in transgenic plants. *Plant J* 68: 302-313.

Le DT, Nishiyama R, Watanabe Y, Mochida K, Yamaguchi-Shinozaki K, et al. (2011) Genome-wide survey and expression analysis of the plant-specific NAC transcription factor family in soybean during development and dehydration stress. *DNA Res* 18: 263-276.

Tamura K, Peterson D, Peterson N, Stecher G, Nei M, et al. (2011) MEGA5: molecular evolutionary genetics analysis using maximum likelihood, evolutionary distance, and maximum parsimony methods. *Mol Biol Evol* 28: 2731-2739.
